# Supplementary material for: First-principles study of CO2 and H2O adsorption on the anatase TiO2(101) surface: effect of Au doping
Source: Royal Society of Chemistry journal article supplement (doi:10.1039/d4cp03511a), 2025-01-01
Supplement: d4cp03511a1.pdf [file d4cp03511a1.pdf]

## Supplementary Information

### First-Principles Study of CO<sub>2</sub> and H<sub>2</sub>O Adsorption on the Anatase TiO<sub>2</sub>(101) Surface: The Effect of Au Doping

Huan Zhang<sup>a</sup>, Meijun Yin<sup>a</sup>, Shuangli Du<sup>a,\*</sup>, Yitao Li<sup>b</sup>, Jialiang Bai<sup>a</sup>, Haonan Chai<sup>a</sup>, Jun Ren<sup>c</sup>

<sup>a</sup> College of Safety and Emergency Management Engineering, Taiyuan University of Technology, Taiyuan, 030024, China

<sup>b</sup> College of Mining Engineering, Taiyuan University of Technology, Taiyuan, 030024, China

<sup>c</sup> College of Chemical Engineering and Technology, Taiyuan University of Technology, Taiyuan 030024, China

\* Corresponding author, email: [dushuangli@tyut.edu.cn](mailto:dushuangli@tyut.edu.cn)

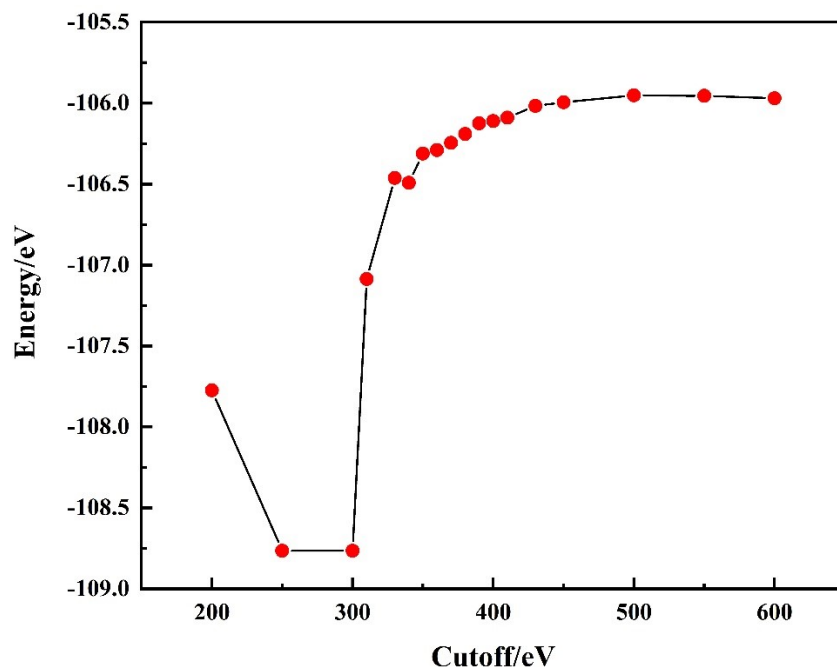

Fig. S1 Truncation energy convergence test results

**Table S1**

Surface energy of TiO<sub>2</sub>(101) surface system.

| Surface          | E <sub>sur</sub> (J/m <sup>2</sup> ) |
|------------------|--------------------------------------|
| TiO <sub>2</sub> | 0.56                                 |
| [45]             | 0.61                                 |

The surface energy of TiO<sub>2</sub>(101) surface system was calculated according to the formula S1:

$$E_{surf} = \frac{1}{2A}(E_{total}^{unrelax} - N * E_{bulk}) + \frac{1}{A}(E_{total}^{relax} - E_{total}^{unrelax}) \quad (S1)$$

Here,  $E_{surf}$  represents the surface energy of the system,  $E_{total}^{unrelax}$  and  $E_{total}^{relax}$  represent the energy of the system before and after relaxation,  $N$  represents the number of single cells in the system, and  $E_{bulk}$  represents the energy of single cells. The calculated surface energy of the TiO<sub>2</sub>(101) surface system is 0.56 J/m<sup>2</sup>, as shown in Table S5. Due to the different calculation details, the final calculation results are slightly different from the previous research results[45], but the overall results are similar, indicating that the selected TiO<sub>2</sub>(101) surface is the most stable surface.

**Table S2**

Adsorption energy ( $E_{ads}$ , kcal/mol), C-O bond length(Å), average bond length(Å), bond angle(°) and adsorption distance ( $d$ , Å) of CO<sub>2</sub> on TiO<sub>2</sub>(101) surface.

| adsorption site | $E_{ads}$ | chemical bond length | average bond length | bond angle | $d$   |       |
|-----------------|-----------|----------------------|---------------------|------------|-------|-------|
| I               | -11.1     | C-O1                 | 1.170               | 1.176      | 177.3 | 2.625 |
|                 |           | C-O2                 | 1.181               |            |       |       |
| II              | -9.7      | C-O1                 | 1.171               | 1.176      | 179.1 | 2.629 |
|                 |           | C-O2                 | 1.181               |            |       |       |
| III             | -7.8      | C-O1                 | 1.170               | 1.177      | 178.5 | 2.614 |
|                 |           | C-O2                 | 1.183               |            |       |       |

Data from Ref.[49].

**Table S3**

Adsorption energy ( $E_{\text{ads}}$ , kcal/mol), H-O bond length ( $\text{\AA}$ ), average bond length ( $\text{\AA}$ ), distance between O and surface Ti atom in  $\text{H}_2\text{O}$  ( $d1$ ,  $\text{\AA}$ ) and distance between H and surface O atom ( $d2$ ,  $\text{\AA}$ ) of  $\text{H}_2\text{O}$  on  $\text{TiO}_2(101)$  surface.

| adsorption site | $E_{\text{ads}}$ | chemical bond length |       | average bond length | $d1$ | $d2$  |
|-----------------|------------------|----------------------|-------|---------------------|------|-------|
| 1               | -19.7            | H1-O                 | 0.988 | 0.988               | -    | 2.201 |
|                 |                  | H2-O                 | 0.988 |                     |      |       |
| 2               | -19.1            | H1-O                 | 0.982 | 0.982               | -    | -     |
|                 |                  | H2-O                 | 0.982 |                     |      |       |

Data from Ref.[50].

**Table S4**

Charge transfer of  $\text{CO}_2$  adsorption on  $\text{TiO}_2(101)$  surface at physical adsorption sites.

| Atom          |    | Before | After        |              |             |              |
|---------------|----|--------|--------------|--------------|-------------|--------------|
|               |    |        | Short-bridge | $\Delta q/e$ | Long-bridge | $\Delta q/e$ |
| C             |    | 2.042  | 1.979        | -0.063       | 2.093       | 0.051        |
| O             | O1 | -1.022 | -0.989       | 0.033        | -1.078      | -0.056       |
|               | O2 | -1.02  | -1           | 0.02         | -1.002      | 0.018        |
| $\text{CO}_2$ |    | 0      |              | -0.01        |             | 0.013        |

When adsorbed at the short-bridge site, the C atom gains electrons, the O atom loses electrons, resulting in a net electron gain. Charge moves from catalyst surface to  $\text{CO}_2$  molecule. The charge at the long-bridge site is transferred from the  $\text{CO}_2$  molecule to catalyst surface.

**Table S5**

Charge transfer of  $\text{CO}_2$  adsorption on Au- $\text{TiO}_2(101)$  surface at physical adsorption sites.

| Atom          |    | Before | After        |              |             |              |         |              |
|---------------|----|--------|--------------|--------------|-------------|--------------|---------|--------------|
|               |    |        | Short-bridge | $\Delta q/e$ | Long-bridge | $\Delta q/e$ | Au-site | $\Delta q/e$ |
| C             |    | 2.042  | 2.092        | 0.05         | 2.11        | 0.068        | 2.101   | 0.059        |
| O             | O1 | -1.022 | -1.088       | -0.066       | -1.085      | -0.063       | -1.047  | -0.025       |
|               | O2 | -1.02  | -0.986       | 0.034        | -1.045      | -0.025       | -1.063  | -0.043       |
| $\text{CO}_2$ |    | 0      |              | 0.018        |             | -0.02        |         | -0.009       |

It can be found that the direction of electron movement at the short-bridge site and the long-

bridge site is reversed after the doping of Au, and the amount of charge transfer increased. For the newly added sites, at the Au site, the C atom gains electrons, the O atom loses electrons, resulting in an overall increase in charge, with charge transferring from catalyst surface to the CO<sub>2</sub> molecule. The doping of Au atoms increases the amount of charge transfer at the physical adsorption sites and promotes the adsorption of CO<sub>2</sub> molecules on catalyst surface.
